# Supplementary material for: Influencers of effective behavior change communication interventions delivered by community health workers in adults: A Scoping Review Protocol
Source: bioRxiv or medRxiv preprint supplement (doi:10.1101/2020.11.29.20240432), 2021-01-15
Supplement: Supplementary file [file media-1.pdf]

Supplementary file 01.

Figure 01: Flow Diagram of Database Search and Inclusion of Studies.

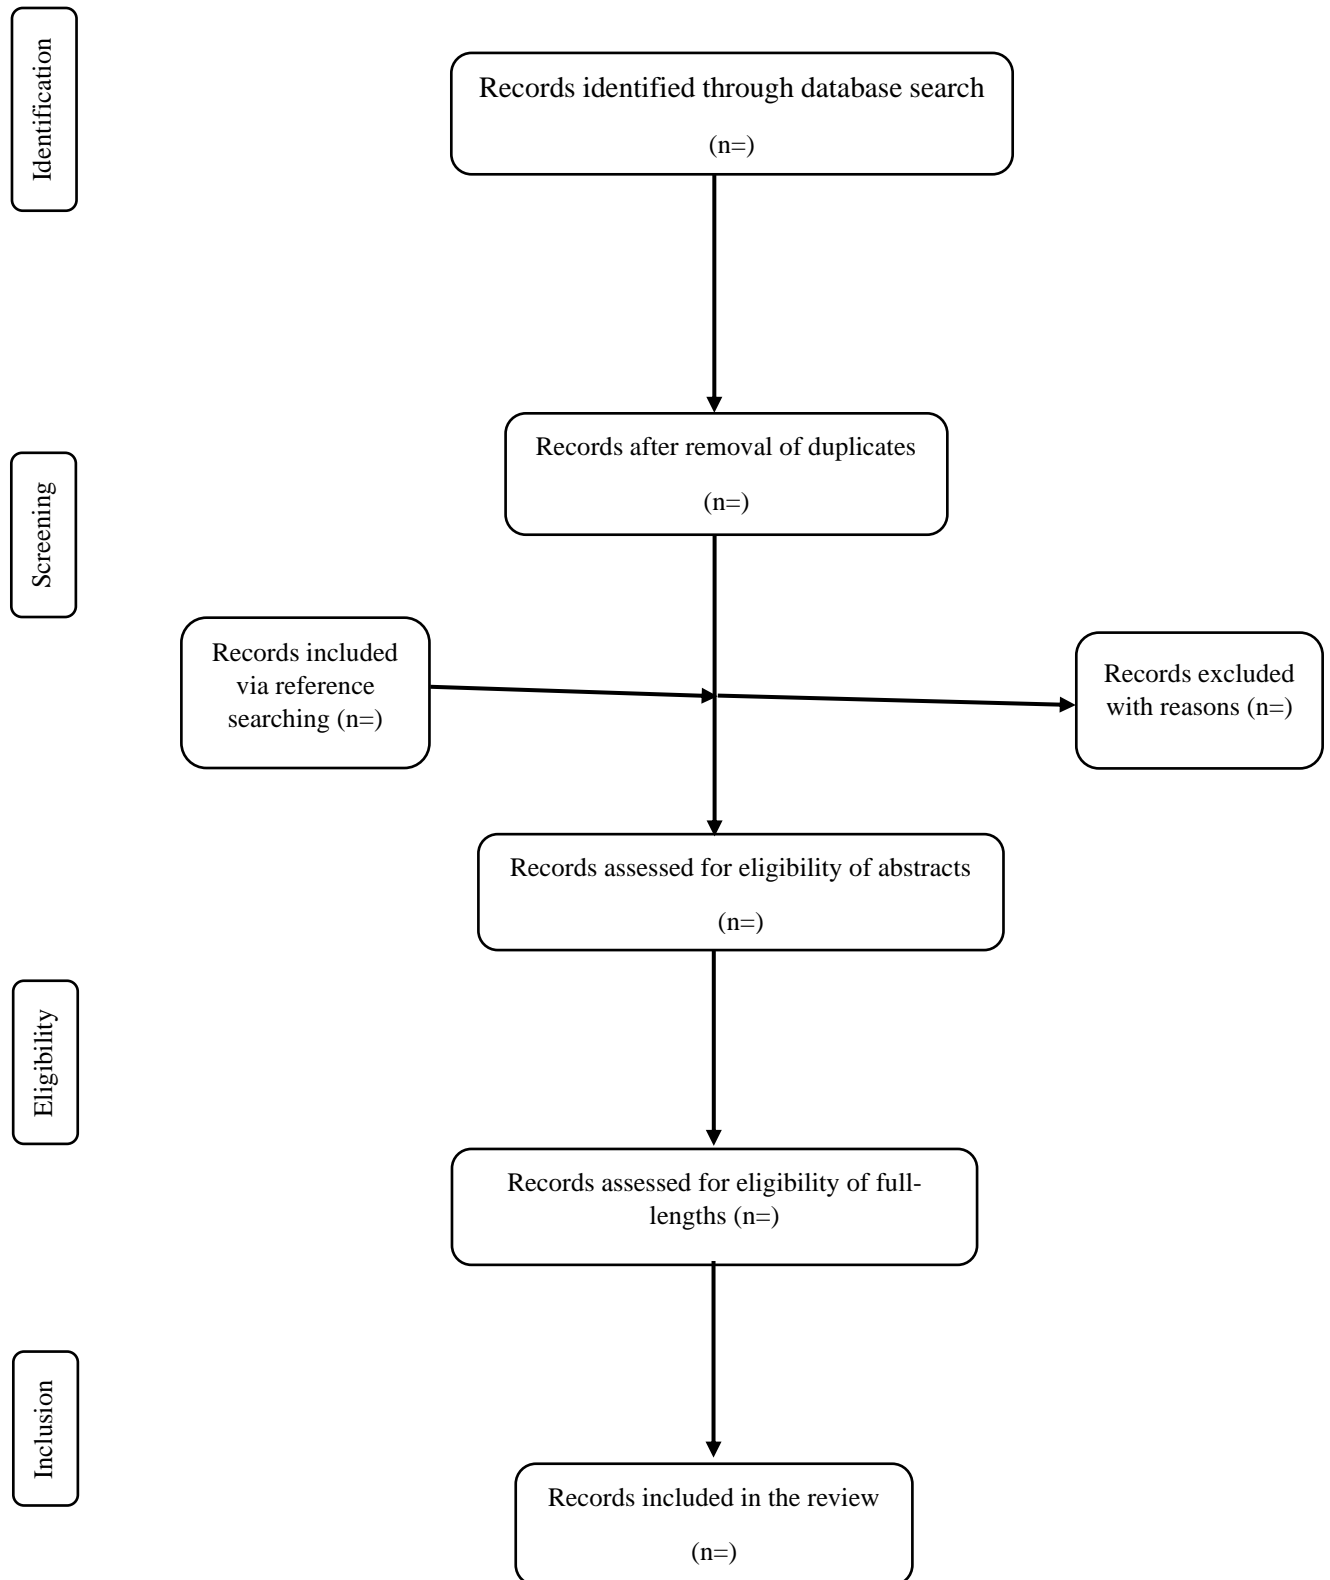

Table 01: Domains/categories for data extraction from selected studies:

| S. No. | Category                                    | Description                                                                       |
|--------|---------------------------------------------|-----------------------------------------------------------------------------------|
| 1      | Bibliography                                | Title<br>Author<br>Year of publication<br>Journal<br>Place/Country                |
| 2      | Community setting                           | Place of intervention                                                             |
| 3      | Intervention type                           | Personal or grouped                                                               |
| 4      | Mode of intervention                        | Medium used for intervention,<br>human resources, electronic, print<br>and others |
| 5      | Temporal characteristics of<br>intervention | Duration<br>Periodicity                                                           |
| 6      | Characteristics of participants             | Age group<br>Health condition/behaviour<br>Gender and others                      |
